# Supplementary material
Source: PubMed Central journal article supplement (PMC9297318)
Supplement: NIHMS540735-supplement-Supp_Figure_S1___Table_S1.pdf [file NIHMS540735-supplement-Supp_Figure_S1___Table_S1.pdf]

## SUPPLEMENTARY MATERIAL

**Figure S1.  $\Delta$ MSMEG\_5437 is indistinguishable from wild type in its sensitivity to ultraviolet radiation, rifampicin and ethionamide.** (a) One milliliter of culture of wild type and *mc<sup>2</sup>155: $\Delta$ 6129* at an  $A_{600}$  of 0.3 was spread as a thin layer on a petri dish and exposed to varying intensities of UV radiation ( 2500, 5000, 7500 and 10,000 $\mu$ J) Ten fold serial dilutions of wild type and *mc<sup>2</sup>155: $\Delta$ 6129* were spotted on Middlebrook 7H10 containing a 2-fold dilution series of antibiotics. The most prominent differences the two strains are seen in ( c) 8 $\mu$ g/ml of ethionamide and (d) 16 $\mu$ g/ml of rifampicin.

**Table S1: Identification of genes required for survival in the presence of MMC using Transposon Site Hybridization (TraSH).** 28 genes corresponding to a variety of different pathways or processes that are at least five-fold underrepresented when *M. smegmatis* is exposed to MMC. Corresponding homologues in *M. tuberculosis* are also shown. Genes are grouped and colored according to their functional categories.

**Table S2. RNA seq profile of wild type and *M. smegmatis mc<sup>2</sup>155: $\Delta$ 6129*.** The number of reads corresponding to each ORF was calculated, and the data were normalized to a million reads as well as to the size of each ORF, and expressed as Reads per Kilobase per million mapped reads. The ratio of RPKM values of  $\Delta$ 6129 to the wild type strain was calculated and ORFs showing a 2.5 fold change in expression are listed. Genes that fall into discernable functional categories are grouped and shaded using different colors.

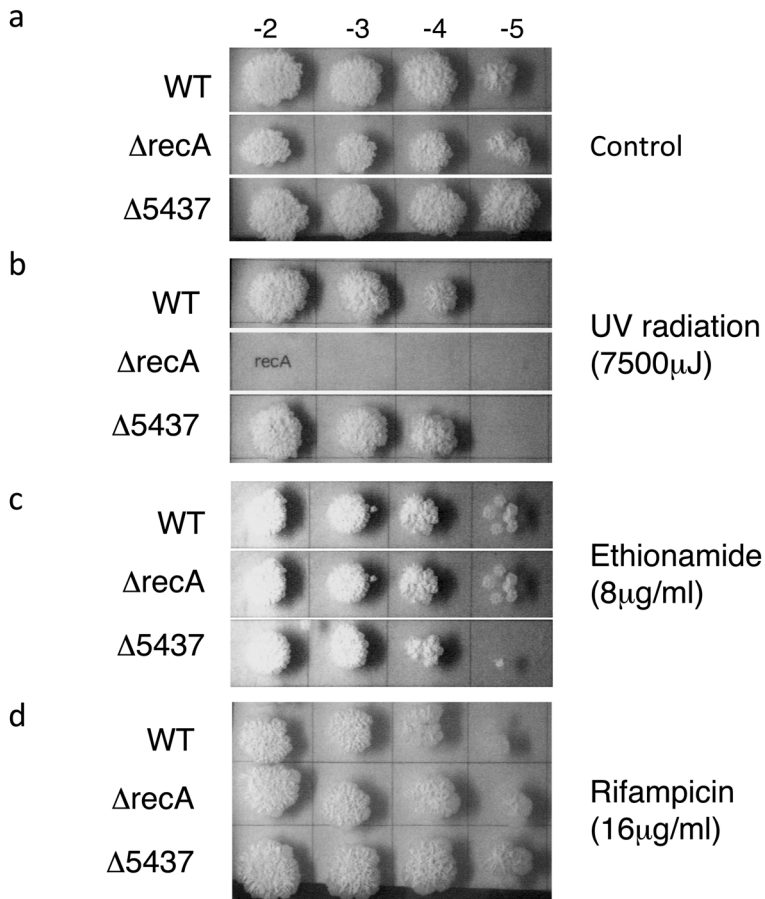

| M.smegmatis gene | Fold under-representation $n \pm sd$ | Homologue in M.tb | Proposed function                                                                                                                    |
|------------------|--------------------------------------|-------------------|--------------------------------------------------------------------------------------------------------------------------------------|
| MSMEG_3018       | 9.6 ± 1.9                            | Rv2569c           | Transglutaminase domain protein/ peptidase activity                                                                                  |
| MSMEG_3637       | 13.4 ± 1.4                           | Rv1842c           | CBS domain protein- bind to the adenosyl portion of molecules such as ATP, AMP and SAM& constitute channel proteins and transporters |
| MSMEG_5266       | 9.4 ± 1.6                            | Rv0176            | RDD family protein involved in transport of an as yet unknown set of ligands                                                         |
| MSMEG_0658       | 17.64                                | -                 | polyamine ABC-transporter                                                                                                            |
| MSMEG_2172       | 6.8 ± 1.1                            | -                 | Dicarboxylate-carrier protein possibly in organic acid transport                                                                     |
| MSMEG_3146       | 32 ± 2.1                             | Rv1478            | Invasin/ Pathogenesis- cell wall associated hydrolysis                                                                               |
| MSMEG_0385       | 8.4 ± 2.5                            | Rv1524            | Hypothetical glycosyl transferase-/ Cell envelope: Biosynthesis and degradation of surface polysaccharides and lipopolysaccharides   |
| MSMEG_5981       | 19.36                                | -                 | Putative glycosyl transferase, / Cell envelope: Biosynthesis and degradation of surface polysaccharides and lipopolysaccharides      |
| MSMEG_4643       | 8.4 ± 1.5                            | Rv2389c           | Resuscitation-promoting factor/ cell wall remodeling                                                                                 |
| MSMEG_5437       | 23.1 ± 1.1                           | Rv1746            | Probable serine /threonine-protein kinase PknB/ Kinase / regulation                                                                  |
| MSMEG_6921       | 7.6 ± 1.5                            | Rv0038            | Conserved hypothetical protein/ domain present in transcriptional regulator                                                          |
| MSMEG_2538       | 10.8 ± 3.9                           | Rv2887            | MarR-family protein transcriptional regulator/ regulation/ transcription factor                                                      |
| MSMEG_4629       | 27.8                                 | Rv2447c           | FolC bifunctional protein; folic acid biosynthesis                                                                                   |
| MSMEG_1820       | 15.6 ± 3.4                           | Rv3275c           | Phosphoribosylaminoimidazole carboxylase, / purine biosynthesis from ribose-5-phosphate                                              |
| MSMEG_2671       | 8.8 ± 1.5                            | Rv2763c           | Dihydrofolate reductase/ tetrahydrofolate biosynthetic process                                                                       |
| MSMEG_4270       | 5.1 ± 1.4                            | Rv2202c           | Adenosine kinase                                                                                                                     |
| MSMEG_2337       | 7.5 ± 1.9                            | -                 | Isopentenyl-diphosphate delta-isomerase - isoprenoid biosynthetic process                                                            |
| MSMEG_6013       | 20.1 ± 2.9                           | Rv3561            | Probable fatty-acid-coa ligase -Fatty acid and phospholipid metabolism                                                               |
| MSMEG_3015       | 8 ± 1.8                              | Rv1517            | Conserved hypothetical protein/ conservation to integral membr prots                                                                 |
| MSMEG_5585       | 10.5                                 | -                 | Hypothetical protein/ sililarity to AraC like DNA-binding protein                                                                    |
| MSMEG_3639       | 10.6 ± 1.4                           | -                 | Conserved hypothetical protein                                                                                                       |
| MSMEG_0354       | 22.1 ± 1.8                           | Rv1974            | Conserved hypothetical protein                                                                                                       |
| MSMEG_1163       | 8 ± 1.6                              | -                 | Hypothetical protein                                                                                                                 |
| MSMEG_2897       | 10.6 ± 2.7                           | -                 | Conserved hypothetical protein                                                                                                       |
| MSMEG_4192       | 18.34 ± 2.2                          | Rv2134c           | Conserved hypothetical protein/ Unknown                                                                                              |
| MSMEG_3426       | 40.1 ± 1.4                           | -                 | Short chain dehydrogenase/ NAD or NADH binding/ nucleotide-sugar metabolic process                                                   |
| MSMEG_5812       | 33.6                                 | Rv2750            | Carveol dehydrogenase - Electron transport                                                                                           |
| MSMEG_5350       | 11.1 ± 1.7                           | Rv3539            | PPE family protein, putative                                                                                                         |
